# Supplementary material for: Spin–vibronic mechanism at work in a luminescent square-planar cyclometalated tridentate Pt(ii) complex: absorption and ultrafast photophysics
Source: Royal Society of Chemistry journal article supplement (doi:10.1039/d3cp01890c), 2023-01-01
Supplement: d3cp01890c1.pdf [file d3cp01890c1.pdf]

## Supplementary Information

# Spin-vibronic mechanism at work in a luminescent square-planar cyclometalated tridentate Pt(II) complex: absorption and ultrafast photophysics

Souvik Mandal, Chantal Daniel\*

Laboratoire de Chimie Quantique, Université de Strasbourg, CNRS UMR7177

Institute Le Bel, 4 rue Blaise Pascal

67000 Strasbourg, France

email: c.daniel@unistra.fr

### THEORY

Spin-vibronic Hamiltonian in  $n_{el}$  coupled diabatic electronic spin-free basis can be expressed as:<sup>1-3</sup>

$$H(\mathbf{Q}) = (T_N + V_0(\mathbf{Q}))\mathbf{I} + \mathbf{W}^{VC}(\mathbf{Q}) + \mathbf{W}^{SOC}(\mathbf{Q}) \quad (\text{S1})$$

where  $T_N$  is the kinetic energy operator of the nucleus,  $V_0(\mathbf{Q})$  is the potential energy of some reference electronic state and  $\mathbf{I}$  is the identity matrix with dimension  $n_{el} \times n_{el}$ . Here  $V_0(\mathbf{Q})$  is determined from the electronic structure calculations at the ground state equilibrium geometry and taken as harmonic potential with vibrational frequencies  $\omega_i$  along the set of dimensionless normal mode coordinates  $\mathbf{Q}$ .  $\mathbf{W}^{VC}(\mathbf{Q})$  is the potential coupling matrix for the vibronic-coupling and  $\mathbf{W}^{SOC}(\mathbf{Q})$  is the spin-orbit coupling matrix. The  $\mathbf{W}^{VC}(\mathbf{Q})$  can be expand by Taylor series around the Franck-Condon (FC) point,  $\mathbf{Q} = 0$ :

$$W_{mn}^{VC}(\mathbf{Q}) = \varepsilon_n + \sum_i \kappa_i^{(n)} Q_i + \frac{1}{2} \sum_{ij} \gamma_{ij}^{(n)} Q_i Q_j + \dots \quad (\text{S2})$$

$$W_{nm}^{VC}(\mathbf{Q}) = \sum_i \lambda_i^{(n,m)} Q_i + \dots \quad (\text{S3})$$

$W_{nn}^{VC}(\mathbf{Q})$  is diagonal matrix element of the  $\mathbf{W}^{VC}(\mathbf{Q})$  matrix.  $\varepsilon_n$  is the vertical excitation energy of the  $n$ th the electronic state.  $\kappa_i^{(n)}$  and  $\gamma_{ij}^{(n)}$  are the first and second order intra-state coupling constants for the  $Q_i$  mode. In the linear vibronic coupling (LVC) model we will neglect the  $\gamma_{ij}^{(n)}$  and all the higher order terms. On the other hand,  $W_{nm}^{VC}(\mathbf{Q})$  is the off-diagonal matrix element with the inter-state coupling constant  $\lambda_i^{(n,m)}$ .

$\kappa_i^{(n)}$  can be calculated from the gradient of adiabatic potential energy surface  $V_n(\mathbf{Q})$  along a particular mode  $Q_i$  at FC point.

$$\kappa_i^{(n)} = \left. \frac{\partial V_n(\mathbf{Q})}{\partial Q_i} \right|_0 \quad (\text{S4})$$

$\kappa_i^{(n)}$  represents the force acting within an electronic surface and are responsible for shift in the potential minima for the excited state compared to the ground state minima, they are called tuning modes.

The  $\lambda_i^{(n,m)}$  can be computed from the difference between hessian of the two adiabatic sates at FC point.

$$\lambda_i^{(n,m)} = \sqrt{\left. \frac{1}{8} \frac{\partial^2 (V_n(\mathbf{Q}) - V_m(\mathbf{Q}))^2}{\partial Q_i^2} \right|_0} \quad (\text{S5})$$

$\lambda_i^{(n,m)}$ s are responsible for the nonadiabatic transition between two electronic states.

Alternatively, beyond the pair of states approximation,  $\lambda_i^{(n,m)}$  can be evaluated from the overlaps between electronic wavefunctions at close-lying geometries. The  $W_{nm}^{VC}(\mathbf{Q})$  matrix in Eq. (S3) can be expresses as

$$W_{nm}^{VC}(\mathbf{Q}) = \langle \Phi_n | H_{\text{el}} | \Phi_m \rangle \quad (\text{S6})$$

where  $H_{\text{el}}$  is the electronic Hamiltonian and  $\Phi_n$  is the  $n$ th diabatic electronic state. Consequently,  $\lambda_i^{(n,m)}$  can be defined as<sup>4</sup>

$$\lambda_i^{(n,m)} = \left. \frac{\partial W_{nm}^V(\mathbf{Q})}{\partial Q_i} \right|_0 = \left. \frac{\partial \langle \Phi_n | H_{\text{el}} | \Phi_m \rangle}{\partial Q_i} \right|_0 \quad (\text{S7})$$

For each normal mode  $i$  of interest, energy  $E_n(\delta Q_i)$  of the adiabatic wavefunction  $\Psi_n(\delta Q_i)$  is calculated at finite displacement of the geometry  $\delta Q_i$ . Additionally, the overlap between the  $\Psi_n(0)$  and  $\Psi_n(\delta Q_i)$  is calculated

$$S_i^{nm} = \langle \Psi_n(0) | \Psi_m(\delta Q_i) \rangle \quad (\text{S8})$$

Afterwards, an adiabatic-to-diabatic transformation matrix  $U$  is constructed by a Löwdin orthogonalization<sup>5</sup> of the overlap matrix  $S$ . The diabatic Hamiltonian at the displaced geometry is obtained as<sup>6,7</sup>

$$\mathbf{W}^V(\delta Q_i) = U \begin{pmatrix} E_1(\delta Q_i) & \cdots & 0 \\ \vdots & \ddots & \vdots \\ 0 & \cdots & E_n(\delta Q_i) \end{pmatrix} U^T \quad (\text{S9})$$

The  $\lambda_i^{(n,m)}$  values are computed by a numerical differentiation

$$\lambda_i^{(n,m)} = \frac{\partial W_{nm}^V(\delta Q_i)}{\delta Q_i} \quad (\text{S10})$$

We can deduce some selection rules for calculating the  $\kappa_i^{(n)}$  and  $\lambda_i^{(n,m)}$ . To get the nonzero matrix elements for the coupling constants the direct product of the irreducible representation of the vibrational mode,  $\Gamma_Q$  and electronic state  $\Gamma_n$  and  $\Gamma_m$  should contain the totally symmetric representation  $\Gamma_A$ .

$$\Gamma_n \otimes \Gamma_Q \otimes \Gamma_m \supset \Gamma_A \quad (\text{S11})$$

All totally symmetric modes will produce nonzero values for  $\kappa_i^{(n)}$ .

The spin-orbit coupling matrix  $\mathbf{W}^{SOC}(\mathbf{Q})$  is also depend on nuclear coordinates ( $\mathbf{Q}$ ), but for simplicity we take constant value at FC geometry  $\mathbf{W}^{SOC}(\mathbf{0})$ . Spin-orbit coupling causes the radiationless singlet-triplet transition. For nine state (lowest five triplet and lowest four singlet) problem in our case the  $\mathbf{W}^{VC}(\mathbf{Q})$  and  $\mathbf{W}^{SOC}(\mathbf{0})$  can be combinedly written as a  $19 \times 19$  matrix (explicitly considering each triple as three states):

$$\mathbf{W}(\mathbf{Q}) = \mathbf{W}^{VC}(\mathbf{Q}) + \mathbf{W}^{SOC}(\mathbf{0}) = \begin{pmatrix} W_{T1,T1} & W_{T1,T2} & W_{T1,T3} & W_{T1,S1} & W_{T1,S2} & W_{T1,T4} & W_{T1,T5} & W_{T1,S3} & W_{T1,S4} \\ W_{T1,T2}^* & W_{T2,T2} & W_{T2,T3} & W_{T2,S1} & W_{T2,S2} & W_{T2,T4} & W_{T2,T5} & W_{T2,S3} & W_{T2,S4} \\ W_{T1,T3}^* & W_{T2,T3}^* & W_{T3,T3} & W_{T3,S1} & W_{T3,S2} & W_{T3,T4} & W_{T3,T5} & W_{T3,S3} & W_{T3,S4} \\ W_{T1,S1}^* & W_{T2,S1}^* & W_{T3,S1}^* & W_{S1,S1} & W_{S1,S2} & W_{S1,T4} & W_{S1,T5} & W_{S1,S3} & W_{S1,S4} \\ W_{T1,S2}^* & W_{T2,S2}^* & W_{T3,S2}^* & W_{S1,S2}^* & W_{S2,S2} & W_{S2,T4} & W_{S2,T5} & W_{S2,S3} & W_{S2,S4} \\ W_{T1,T4}^* & W_{T2,T4}^* & W_{T3,T4}^* & W_{S1,T4}^* & W_{S2,T4}^* & W_{T4,T4} & W_{T4,T5} & W_{T4,S3} & W_{T4,S4} \\ W_{T1,T5}^* & W_{T2,T5}^* & W_{T3,T5}^* & W_{S1,T5}^* & W_{S2,T5}^* & W_{T4,T5}^* & W_{T5,T5} & W_{T5,S3} & W_{T5,S4} \\ W_{T1,S3}^* & W_{T2,S3}^* & W_{T3,S3}^* & W_{S1,S3}^* & W_{S2,S3}^* & W_{T4,S3}^* & W_{T5,S3}^* & W_{S3,S3} & W_{S3,S4} \\ W_{T1,S4}^* & W_{T2,S4}^* & W_{T3,S4}^* & W_{S1,S4}^* & W_{S2,S4}^* & W_{T4,S4}^* & W_{T5,S4}^* & W_{S3,S4}^* & W_{S4,S4} \end{pmatrix} \quad (\text{S12})$$

where the asterisk stands for the conjugate transpose. Considering the triplet component explicitly  $\mathbf{W}(\mathbf{Q})$  have the submatrices

$$W_{nn} = \epsilon_n + \sum_{i \in A'} \kappa_i^{(n)} Q_i; \quad W_{S_n(A'), S_m(A'')} = \sum_{i \in A''} \lambda_i^{S_n, S_m} Q_i; \quad (\text{S13})$$

$$W_{S_n(A'), S_m(A')} = W_{S_n(A''), S_m(A'')} = \sum_{i \in A'} \lambda_i^{S_n, S_m} Q_i; \quad (\text{S14})$$

$$W_{S_n(A'), T_m(A')} = W_{S_n(A''), T_m(A'')} = \begin{pmatrix} 0 & \eta^{S_n/T_m} & 0 \end{pmatrix}; \quad (\text{S15})$$

$$W_{S_n(A'), T_m(A'')} = W_{S_n(A''), T_m(A')} = \begin{pmatrix} \eta^{*S_n/T_m} & 0 & \eta^{S_n/T_m} \end{pmatrix}; \quad (\text{S16})$$

$$W_{T_n(A'), T_m(A')} = W_{T_n(A''), T_m(A'')} \begin{pmatrix} \sum_{i \in A'} \lambda_i^{T_1, T_3} Q_i + \eta^{T_n/T_m} & 0 & 0 \\ 0 & \sum_{i \in A'} \lambda_i^{T_1, T_3} Q_i & 0 \\ 0 & 0 & \sum_{i \in A'} \lambda_i^{T_1, T_3} Q_i + \eta^{*T_n/T_m} \end{pmatrix}; \quad (\text{S17})$$

$$W_{T_n(A'), T_m(A'')} = \begin{pmatrix} \sum_{i \in A''} \lambda_i^{T_n, T_m} Q_i & \eta^{T_n/T_m} & 0 \\ -\eta^{*T_n/T_m} & \sum_{i \in A''} \lambda_i^{T_n, T_m} Q_i & \eta^{T_n/T_m} \\ 0 & -\eta^{*T_n/T_m} & \sum_{i \in A''} \lambda_i^{T_n, T_m} Q_i \end{pmatrix} \quad (\text{S18})$$

The sub-matrixes goes from ascending order of magnetic quantum number.  $\epsilon_n$  is the vertical excitation energy of the spin-free electronic state  $n$ . The zero values in the sub-matrixes  $W_{nm}$  are due to symmetry reason. The  $\eta^{n/m}$  is the spin-orbit coupling constant obtained from the electronic structure calculation using TDDFT. All the constant used to construct the Hamiltonian in Eq. (S1) are presented in Table S6.

TABLE S1: Important geometrical parameters for the optimized structure of the Pt (II) complex

| Parameters        | Calculated (Å) | Expt (Å) <sup>8</sup> |
|-------------------|----------------|-----------------------|
| Pt(1)-C(30)       | 1.927          | 1.903                 |
| Pt(1)-N(3)        | 2.068          | 2.035                 |
| Pt(1)-N(4)        | 2.068          | 2.036                 |
| Pt(1)-Cl(2)       | 2.494          | 2.405                 |
| N(3)-Pt(1)-N(4)   | 160.4          | 161.29                |
| C(30)-Pt(1)-Cl(2) | 180.0          | 178.30                |
| C(30)-Pt(1)-N(3)  | 80.2           | 80.63                 |
| C(1)-Pt(1)-N(4)   | 80.2           | 80.68                 |

TABLE S2: Calculated frequencies (in  $\text{cm}^{-1}$ ) at the optimized ground state geometry.

| mode          | $\omega$ |
|---------------|----------|---------------|----------|---------------|----------|---------------|----------|---------------|----------|
| $Q_1(A'')$    | 8.290    | $Q_2(A')$     | 34.851   | $Q_3(A')$     | 55.740   | $Q_4(A'')$    | 85.142   | $Q_5(A')$     | 92.193   |
| $Q_7(A'')$    | 127.164  | $Q_8(A')$     | 143.300  | $Q_9(A')$     | 170.017  | $Q_{10}(A'')$ | 180.861  | $Q_{11}(A')$  | 229.507  |
| $Q_{13}(A'')$ | 251.223  | $Q_{14}(A')$  | 255.266  | $Q_{15}(A')$  | 288.135  | $Q_{16}(A')$  | 315.298  | $Q_{17}(A'')$ | 332.958  |
| $Q_{19}(A'')$ | 381.816  | $Q_{20}(A'')$ | 422.516  | $Q_{21}(A')$  | 437.475  | $Q_{22}(A')$  | 447.899  | $Q_{23}(A'')$ | 458.049  |
| $Q_{25}(A')$  | 579.828  | $Q_{26}(A'')$ | 596.894  | $Q_{27}(A'')$ | 602.483  | $Q_{28}(A')$  | 636.196  | $Q_{29}(A'')$ | 656.164  |
| $Q_{31}(A')$  | 676.722  | $Q_{32}(A')$  | 699.275  | $Q_{33}(A')$  | 733.785  | $Q_{34}(A'')$ | 757.478  | $Q_{35}(A')$  | 763.823  |
| $Q_{37}(A')$  | 794.754  | $Q_{38}(A'')$ | 851.016  | $Q_{39}(A')$  | 882.420  | $Q_{40}(A'')$ | 901.380  | $Q_{41}(A')$  | 903.067  |
| $Q_{43}(A'')$ | 921.004  | $Q_{44}(A'')$ | 992.610  | $Q_{45}(A')$  | 993.206  | $Q_{46}(A'')$ | 1014.391 | $Q_{47}(A')$  | 1014.436 |
| $Q_{49}(A')$  | 1035.936 | $Q_{50}(A'')$ | 1036.403 | $Q_{51}(A')$  | 1059.096 | $Q_{52}(A')$  | 1062.501 | $Q_{53}(A'')$ | 1071.297 |
| $Q_{55}(A'')$ | 1113.520 | $Q_{56}(A')$  | 1118.521 | $Q_{57}(A')$  | 1142.763 | $Q_{58}(A'')$ | 1181.510 | $Q_{59}(A')$  | 1181.718 |
| $Q_{61}(A')$  | 1199.148 | $Q_{62}(A')$  | 1255.188 | $Q_{63}(A'')$ | 1263.568 | $Q_{64}(A'')$ | 1293.592 | $Q_{65}(A'')$ | 1308.220 |
| $Q_{67}(A'')$ | 1335.737 | $Q_{68}(A')$  | 1357.547 | $Q_{69}(A')$  | 1412.060 | $Q_{70}(A')$  | 1435.979 | $Q_{71}(A'')$ | 1440.837 |
| $Q_{73}(A')$  | 1480.277 | $Q_{74}(A'')$ | 1482.590 | $Q_{75}(A')$  | 1486.981 | $Q_{76}(A')$  | 1500.461 | $Q_{77}(A'')$ | 1505.284 |
| $Q_{79}(A')$  | 1589.856 | $Q_{80}(A'')$ | 1601.424 | $Q_{81}(A')$  | 1621.692 | $Q_{82}(A'')$ | 1637.169 | $Q_{83}(A')$  | 1638.581 |
| $Q_{85}(A')$  | 3070.894 | $Q_{86}(A'')$ | 3098.855 | $Q_{87}(A'')$ | 3158.849 | $Q_{88}(A')$  | 3160.207 | $Q_{89}(A'')$ | 3178.556 |
| $Q_{91}(A')$  | 3191.104 | $Q_{92}(A'')$ | 3191.159 | $Q_{93}(A'')$ | 3197.702 | $Q_{94}(A')$  | 3197.805 | $Q_{95}(A'')$ | 3204.350 |
|               |          |               |          |               |          |               |          | $Q_{96}(A')$  | 3205.070 |

TABLE S3: SOC matrix elements (calculated as root mean square in  $\text{cm}^{-1}$ ) between the low-lying singlet and triplet states of  $[\text{Pt}(\text{dpybMe})\text{Cl}]$ .

|                                    | T1      | T2      | T3      | T4      | T5      | T6      | T7      | T8      | T9      | T10     |
|------------------------------------|---------|---------|---------|---------|---------|---------|---------|---------|---------|---------|
| $\langle S H_{\text{So}} T\rangle$ |         |         |         |         |         |         |         |         |         |         |
| S1:                                | 0.56    | 62.43   | 1.48    | 843.22  | 1883.80 | 647.31  | 93.83   | 1121.89 | 1.72    | 395.48  |
| S2:                                | 69.16   | 0.27    | 438.89  | 1.27    | 205.70  | 2.79    | 1702.72 | 685.47  | 795.39  | 2.68    |
| S3:                                | 1696.46 | 163.57  | 791.31  | 1994.72 | 0.24    | 1294.01 | 30.47   | 161.90  | 138.46  | 1281.71 |
| S4:                                | 765.81  | 2.90    | 292.14  | 6.05    | 2071.24 | 1.13    | 355.79  | 970.97  | 12.30   | 10.36   |
| S5:                                | 55.51   | 1530.91 | 1082.04 | 572.46  | 48.81   | 315.41  | 1.70    | 1.45    | 1986.68 | 378.66  |
| S6:                                | 960.31  | 331.45  | 249.36  | 908.79  | 165.53  | 617.56  | 1.22    | 2.70    | 280.94  | 672.57  |
| S7:                                | 7.72    | 847.22  | 16.89   | 285.93  | 11.43   | 39.90   | 2323.34 | 824.74  | 26.74   | 183.58  |
| S8:                                | 256.26  | 0.87    | 46.28   | 2.57    | 497.77  | 1.82    | 300.11  | 198.99  | 241.74  | 0.36    |
| S9:                                | 171.12  | 911.25  | 469.42  | 197.23  | 1.64    | 113.62  | 146.81  | 123.90  | 962.42  | 317.41  |
| S10:                               | 702.06  | 1.73    | 284.32  | 6.48    | 1950.01 | 6.33    | 480.16  | 892.18  | 15.55   | 2.97    |
| $\langle T H_{\text{So}} T\rangle$ |         |         |         |         |         |         |         |         |         |         |
| T1:                                | 0.00    | 63.36   | 1.81    | 1007.90 | 2357.98 | 583.80  | 157.96  | 1368.94 | 3.13    | 708.30  |
| T2:                                | 63.36   | 0.00    | 573.88  | 1.31    | 224.77  | 3.86    | 2040.44 | 829.19  | 973.99  | 3.88    |
| T3:                                | 1.81    | 573.88  | 0.00    | 385.21  | 1087.41 | 189.68  | 1571.53 | 97.68   | 6.50    | 485.91  |
| T4:                                | 1007.90 | 1.31    | 385.21  | 0.00    | 2781.81 | 3.37    | 999.48  | 1109.15 | 109.86  | 11.59   |
| T5:                                | 2357.98 | 224.77  | 1087.41 | 2781.81 | 0.00    | 1803.42 | 161.22  | 164.11  | 221.80  | 1785.54 |
| T6:                                | 583.80  | 3.86    | 189.68  | 3.37    | 1803.42 | 0.00    | 625.31  | 759.90  | 258.76  | 11.29   |
| T7:                                | 157.96  | 2040.44 | 1571.53 | 999.48  | 161.22  | 625.31  | 0.00    | 9.95    | 2708.74 | 403.39  |
| T8:                                | 1368.94 | 829.19  | 97.68   | 1109.15 | 164.11  | 759.90  | 9.95    | 0.00    | 856.89  | 1053.88 |
| T9:                                | 3.13    | 973.99  | 6.50    | 109.86  | 221.80  | 258.76  | 2708.74 | 856.89  | 0.00    | 516.44  |
| T10:                               | 708.30  | 3.88    | 485.91  | 11.59   | 1785.54 | 11.29   | 403.39  | 1053.88 | 516.44  | 0.00    |

TABLE S4: TD-DFT/B3LYP transition energies (in eV) without spin-orbit coupling to the low-lying singlet and triplet excited states of [Pt(dpybMe)Cl], absorption wavelengths (in nm) and associated oscillator strengths ( $f$ ). The labels are based on dominant contributions.

| Label                 | State         | Energy (eV) | Wavelength (nm) | $f$    |
|-----------------------|---------------|-------------|-----------------|--------|
| LC / MLCT             | S1 ( $A'$ )   | 3.17159     | 390.91          | 0.0056 |
| LC / MLCT             | S2 ( $A''$ )  | 3.17732     | 390.20          | 0.3013 |
| MLCT                  | S3 ( $A'$ )   | 3.62561     | 341.96          | 0.0239 |
| LC / MLCT             | S4 ( $A''$ )  | 3.63159     | 341.39          | 0.0086 |
| MLCT                  | S5 ( $A''$ )  | 3.76071     | 329.67          | 0.0000 |
| MLCT / XLCT           | S6 ( $A''$ )  | 3.82990     | 323.72          | 0.0000 |
| LC / MLCT             | S7 ( $A'$ )   | 3.94260     | 314.46          | 0.1702 |
| LC / MLCT             | S8 ( $A''$ )  | 3.95111     | 313.79          | 0.0003 |
| MLCT / XLCT           | S9 ( $A'$ )   | 3.98974     | 310.75          | 0.0003 |
| LC / MLCT             | S10 ( $A''$ ) | 4.13702     | 299.68          | 0.6798 |
| LC / MLCT             | S11 ( $A'$ )  | 4.27430     | 290.06          | 0.1669 |
| LC / MLCT             | S12 ( $A'$ )  | 4.30301     | 288.12          | 0.2240 |
| LC / MLCT / LMCT / MC | S13 ( $A'$ )  | 4.38446     | 282.77          | 0.0002 |
| MLCT                  | S14 ( $A''$ ) | 4.54979     | 272.50          | 0.0000 |
| LC / XLCT             | S15 ( $A'$ )  | 4.56407     | 271.64          | 0.0559 |
| LC / XLCT             | S16 ( $A''$ ) | 4.57962     | 270.72          | 0.0960 |
| LC / MLCT             | S17 ( $A'$ )  | 4.63061     | 267.74          | 0.0063 |
| MLCT / XLCT           | S18 ( $A'$ )  | 4.73970     | 261.58          | 0.0002 |
| LC / MLCT             | S19 ( $A''$ ) | 4.82736     | 256.83          | 0.5320 |
| MLCT                  | S20 ( $A'$ )  | 4.84708     | 255.78          | 0.0086 |
| LC / MLCT             | T1 ( $A'$ )   | 2.75759     | 449.60          | 0.0000 |
| LC / MLCT             | T2 ( $A''$ )  | 2.79256     | 443.97          | 0.0000 |
| LC                    | T3 ( $A'$ )   | 3.15250     | 393.28          | 0.0000 |
| LC / MLCT             | T4 ( $A''$ )  | 3.31840     | 373.61          | 0.0000 |
| MLCT                  | T5 ( $A'$ )   | 3.46361     | 357.95          | 0.0000 |
| LC / MLCT             | T6 ( $A''$ )  | 3.65718     | 339.00          | 0.0000 |
| MLCT                  | T7 ( $A''$ )  | 3.73263     | 332.15          | 0.0000 |
| MLCT / XLCT           | T8 ( $A''$ )  | 3.77580     | 328.35          | 0.0000 |
| LC / MLCT             | T9 ( $A'$ )   | 3.82513     | 324.12          | 0.0000 |
| LC / MLCT             | T10 ( $A''$ ) | 3.85850     | 321.32          | 0.0000 |
| LC / MLCT             | T11 ( $A'$ )  | 3.94068     | 314.62          | 0.0000 |
| MLCT / XLCT           | T12 ( $A'$ )  | 3.96048     | 313.04          | 0.0000 |
| LC / MLCT / LMCT / MC | T13 ( $A'$ )  | 4.01949     | 308.45          | 0.0000 |
| LC / MLCT             | T14 ( $A'$ )  | 4.11696     | 301.14          | 0.0000 |
| MC / MLCT             | T15 ( $A'$ )  | 4.26061     | 290.99          | 0.0000 |
| LC                    | T16 ( $A''$ ) | 4.28503     | 289.33          | 0.0000 |
| MC / MLCT             | T17 ( $A''$ ) | 4.34098     | 285.60          | 0.0000 |
| LC / MLCT             | T18 ( $A'$ )  | 4.38271     | 282.88          | 0.0000 |
| LC / XLCT             | T19 ( $A''$ ) | 4.42401     | 280.24          | 0.0000 |
| LC / MLCT             | T20 ( $A'$ )  | 4.42920     | 279.92          | 0.0000 |

TABLE S5: TD-DFT/B3LYP transition energies (in eV) with spin-orbit coupling to the low-lying excited states of [Pt(dpybMe)Cl], absorption wavelengths (in nm) and associated oscillator strengths ( $f$ ).

| State        | Energy (eV) | Wavelength (nm) | $f$    |
|--------------|-------------|-----------------|--------|
| 1 ( $A''$ )  | 2.66777     | 464.73          | 0.0000 |
| 2 ( $A''$ )  | 2.66819     | 464.66          | 0.0009 |
| 3 ( $A'$ )   | 2.67323     | 463.78          | 0.0009 |
| 4 ( $A''$ )  | 2.72914     | 454.28          | 0.0000 |
| 5 ( $A'$ )   | 2.72918     | 454.28          | 0.0000 |
| 6 ( $A'$ )   | 2.73044     | 454.07          | 0.0007 |
| 7 ( $A'$ )   | 2.99532     | 413.91          | 0.0045 |
| 8 ( $A''$ )  | 3.04658     | 406.95          | 0.2086 |
| 9 ( $A''$ )  | 3.06784     | 404.13          | 0.0000 |
| 10 ( $A'$ )  | 3.07369     | 403.36          | 0.0004 |
| 11 ( $A'$ )  | 3.08981     | 401.25          | 0.0001 |
| 12 ( $A''$ ) | 3.09186     | 400.99          | 0.0485 |
| 13 ( $A''$ ) | 3.09268     | 400.88          | 0.0011 |
| 14 ( $A'$ )  | 3.11641     | 397.83          | 0.0067 |
| 15 ( $A''$ ) | 3.21362     | 385.80          | 0.0436 |
| 16 ( $A'$ )  | 3.45978     | 358.35          | 0.0536 |
| 17 ( $A'$ )  | 3.48560     | 355.69          | 0.0001 |
| 18 ( $A''$ ) | 3.49261     | 354.98          | 0.0001 |
| 19 ( $A''$ ) | 3.49303     | 354.94          | 0.0061 |
| 20 ( $A''$ ) | 3.50482     | 353.74          | 0.0000 |
| 21 ( $A'$ )  | 3.51928     | 352.29          | 0.0039 |
| 22 ( $A'$ )  | 3.53269     | 350.95          | 0.0036 |
| 23 ( $A''$ ) | 3.61856     | 342.62          | 0.0000 |
| 24 ( $A'$ )  | 3.64689     | 339.96          | 0.0045 |
| 25 ( $A''$ ) | 3.65471     | 339.23          | 0.0026 |
| 26 ( $A'$ )  | 3.65859     | 338.87          | 0.0094 |
| 27 ( $A'$ )  | 3.70939     | 334.23          | 0.0008 |
| 28 ( $A''$ ) | 3.72561     | 332.78          | 0.0000 |
| 29 ( $A'$ )  | 3.75408     | 330.25          | 0.0028 |
| 30 ( $A''$ ) | 3.75785     | 329.92          | 0.0052 |



TABLE S6: List of the Parameters Entering the Model Hamiltonian. All the parameters are given in eV.

| mode ( $A'$ ) | $\omega$ | $\kappa^{S1}$ | $\kappa^{S2}$ | $\kappa^{S3}$ | $\kappa^{S4}$ | $\kappa^{T1}$ | $\kappa^{T2}$ | $\kappa^{T3}$ | $\kappa^{T4}$ | $\kappa^{T5}$ | $\lambda^{T1,T3}$ |
|---------------|----------|---------------|---------------|---------------|---------------|---------------|---------------|---------------|---------------|---------------|-------------------|
| $Q_2$         | 0.004    | 0.002         | 0.001         | 0.001         | 0.001         | 0.002         | 0.001         | 0.001         | 0.001         | 0.001         | 0.0               |
| $Q_8$         | 0.018    | -0.010        | -0.005        | -0.003        | -0.002        | -0.004        | -0.005        | 0.007         | -0.008        | -0.006        | 0.0               |
| $Q_{11}$      | 0.028    | 0.034         | 0.034         | -0.010        | -0.009        | 0.022         | 0.027         | 0.001         | -0.007        | -0.012        | 0.012             |
| $Q_{15}$      | 0.036    | 0.031         | 0.027         | 0.009         | -0.022        | 0.029         | 0.028         | -0.022        | -0.018        | 0.009         | 0.016             |
| $Q_{32}$      | 0.087    | 0.039         | 0.027         | 0.032         | 0.043         | 0.040         | 0.031         | 0.030         | 0.050         | 0.030         | 0.0               |
| $Q_{49}$      | 0.128    | -0.050        | -0.029        | -0.039        | -0.086        | -0.047        | -0.030        | -0.058        | -0.094        | -0.040        | 0.011             |
| $Q_{62}$      | 0.156    | -0.040        | -0.038        | -0.006        | -0.008        | -0.036        | -0.032        | -0.016        | -0.014        | -0.004        | 0.0               |
| $Q_{68}$      | 0.168    | -0.052        | -0.086        | -0.045        | -0.081        | -0.086        | -0.109        | -0.106        | -0.069        | -0.050        | 0.014             |
| $Q_{75}$      | 0.184    | -0.022        | -0.056        | 0.002         | -0.005        | -0.049        | -0.061        | -0.021        | -0.006        | -0.004        | 0.0               |
| $Q_{76}$      | 0.186    | 0.036         | 0.050         | 0.059         | 0.097         | 0.056         | 0.058         | 0.081         | 0.103         | 0.060         | 0.018             |
| $Q_{81}$      | 0.201    | 0.051         | -0.024        | -0.035        | -0.077        | 0.042         | -0.040        | -0.179        | -0.064        | -0.031        | 0.012             |
| $Q_{83}$      | 0.203    | 0.064         | -0.057        | 0.053         | 0.052         | 0.009         | -0.070        | -0.057        | 0.055         | 0.045         | 0.039             |

  

| mode ( $A''$ ) | $\omega$ | $\lambda^{S1,S2}$ | $\lambda^{S1,S4}$ | $\lambda^{S2,S3}$ | $\lambda^{T1,T2}$ | $\lambda^{T1,T4}$ | $\lambda^{T2,T3}$ | $\lambda^{T3,T4}$ |
|----------------|----------|-------------------|-------------------|-------------------|-------------------|-------------------|-------------------|-------------------|
| $Q_{50}$       | 0.128    | 0.044             | 0.016             | 0.005             | 0.036             | 0.017             | 0.004             | 0.047             |
| $Q_{60}$       | 0.147    | 0.035             | 0.004             | 0.012             | 0.020             | 0.008             | 0.013             | 0.037             |
| $Q_{64}$       | 0.160    | 0.044             | 0.029             | 0.004             | 0.073             | 0.031             | 0.002             | 0.037             |
| $Q_{77}$       | 0.187    | 0.071             | 0.023             | 0.008             | 0.085             | 0.041             | 0.001             | 0.077             |
| $Q_{78}$       | 0.196    | 0.075             | 0.040             | 0.006             | 0.113             | 0.048             | 0.043             | 0.074             |
| $Q_{80}$       | 0.199    | 0.011             | 0.052             | 0.010             | 0.077             | 0.024             | 0.071             | 0.009             |

  

| State        | $E$   | $\eta$ |                  |       |                  |
|--------------|-------|--------|------------------|-------|------------------|
| S1 ( $A'$ )  | 3.172 | S1/T4  | 0.0 - 0.074 i    | S4/T3 | 0.0 + 0.026 i    |
| S2 ( $A''$ ) | 3.177 | S1/T5  | 0.0 + 0.234 i    | S4/T5 | -0.182 - 0.001 i |
| S3 ( $A'$ )  | 3.626 | S2/T3  | -0.0 + 0.038 i   | T1/T4 | 0.0 - 0.062 i    |
| S4 ( $A''$ ) | 3.632 | S2/T5  | -0.018 + 0.0 i   | T1/T5 | 0.0 + 0.207 i    |
| T1 ( $A'$ )  | 2.758 | S3/T1  | 0.0 - 0.21 i     | T2/T3 | 0.0 + 0.036 i    |
| T2 ( $A''$ ) | 2.793 | S3/T2  | 0.014 + 0.0 i    | T2/T5 | 0.014 - 0.0 i    |
| T3 ( $A'$ )  | 3.152 | S3/T3  | 0.0 + 0.098 i    | T3/T4 | 0.0 + 0.024 i    |
| T4 ( $A''$ ) | 3.318 | S3/T4  | -0.175 - 0.001 i | T3/T5 | 0.0 - 0.095 i    |
| T5 ( $A'$ )  | 3.464 | S4/T1  | -0.0 - 0.067 i   | T4/T5 | 0.172 + 0.001 i  |

TABLE S7: Number of primitive basis and SPF for different mode combination used in the MCTDH calculation for the lowest 19 electronic states of the of [Pt(dpybMe)Cl] Complex using the 18-mode model Hamiltonian.

| Modes                      | Primitive basis | SPF basis                         |
|----------------------------|-----------------|-----------------------------------|
| $(Q_2, Q_8, Q_{11})$       | (13,13,13)      | (7, 7, 7, 7, 7, 7, 7, 7, 7, 7, 7) |
| $(Q_{15}, Q_{32}, Q_{49})$ | (13,13,13)      | (7, 7, 7, 7, 7, 7, 7, 7, 7, 7, 7) |
| $(Q_{62}, Q_{68}, Q_{75})$ | (13,13,13)      | (7, 7, 7, 7, 7, 7, 7, 7, 7, 7, 7) |
| $(Q_{76}, Q_{81}, Q_{83})$ | (13,13,13)      | (7, 7, 7, 7, 7, 7, 7, 7, 7, 7, 7) |
| $(Q_{50}, Q_{60}, Q_{64})$ | (13,13,13)      | (7, 7, 7, 7, 7, 7, 7, 7, 7, 7, 7) |
| $(Q_{77}, Q_{78}, Q_{80})$ | (13,13,13)      | (7, 7, 7, 7, 7, 7, 7, 7, 7, 7, 7) |

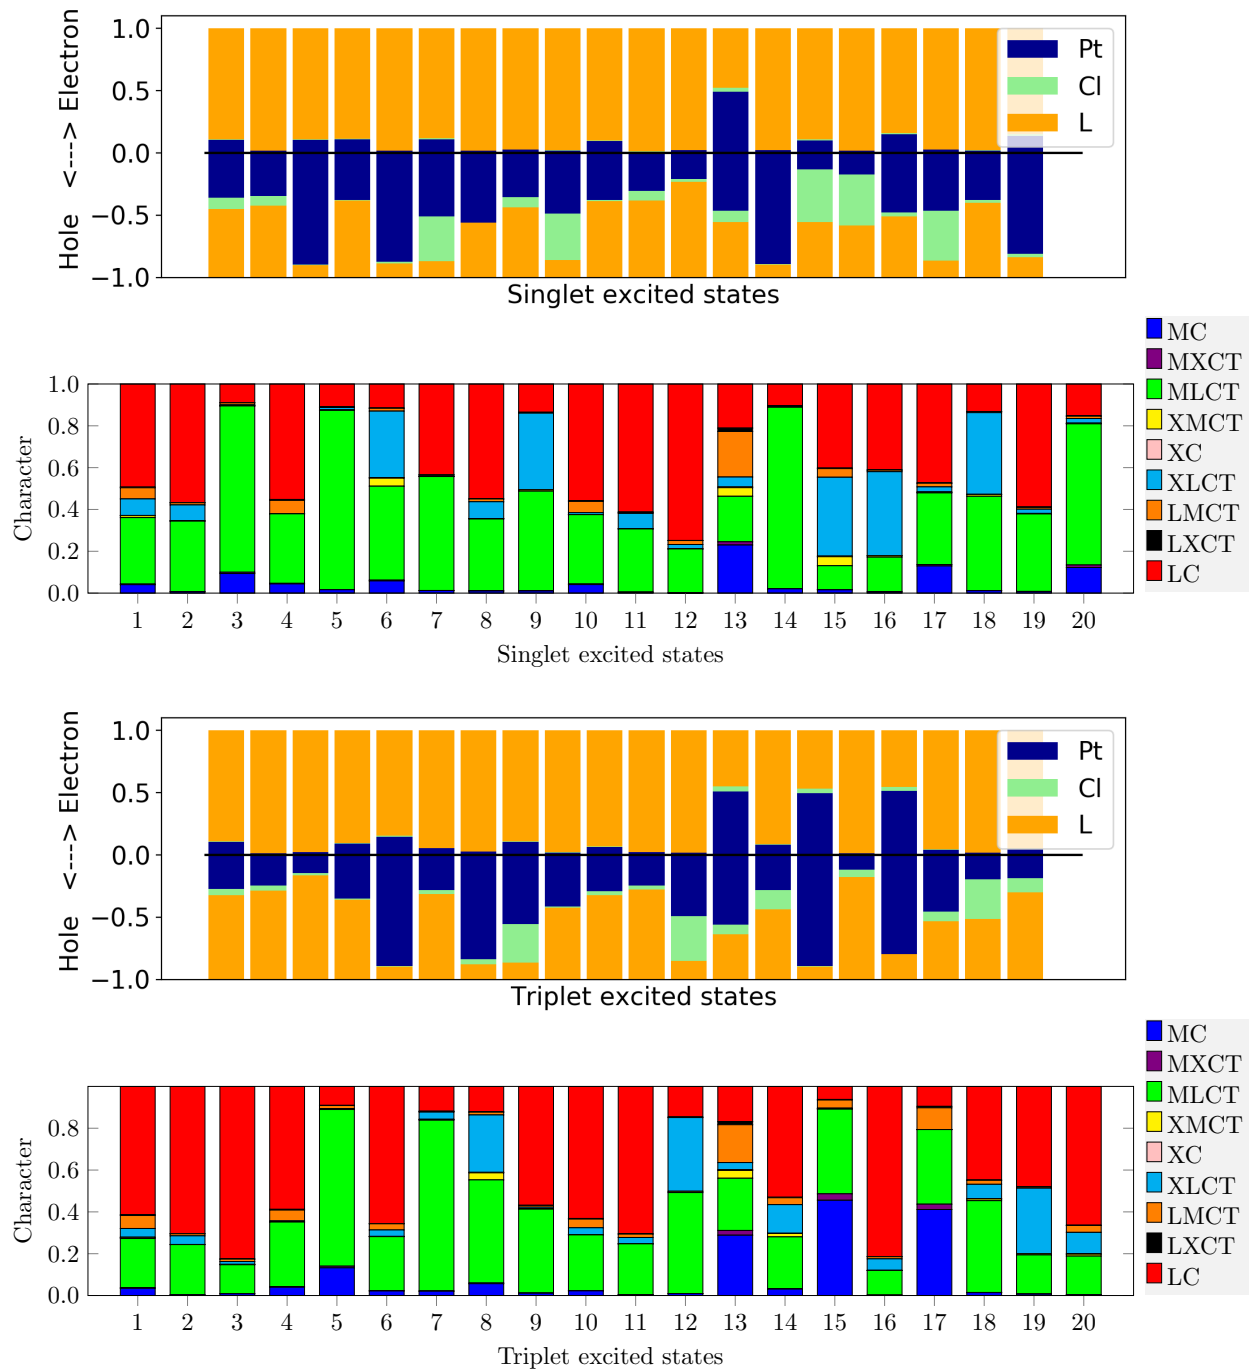

FIG. S1: TheoDORE analysis of low-lying singlet(top two panels) and triplet (bottom two panels) excited states calculated at the TD-DFT level at Franck-Condon.

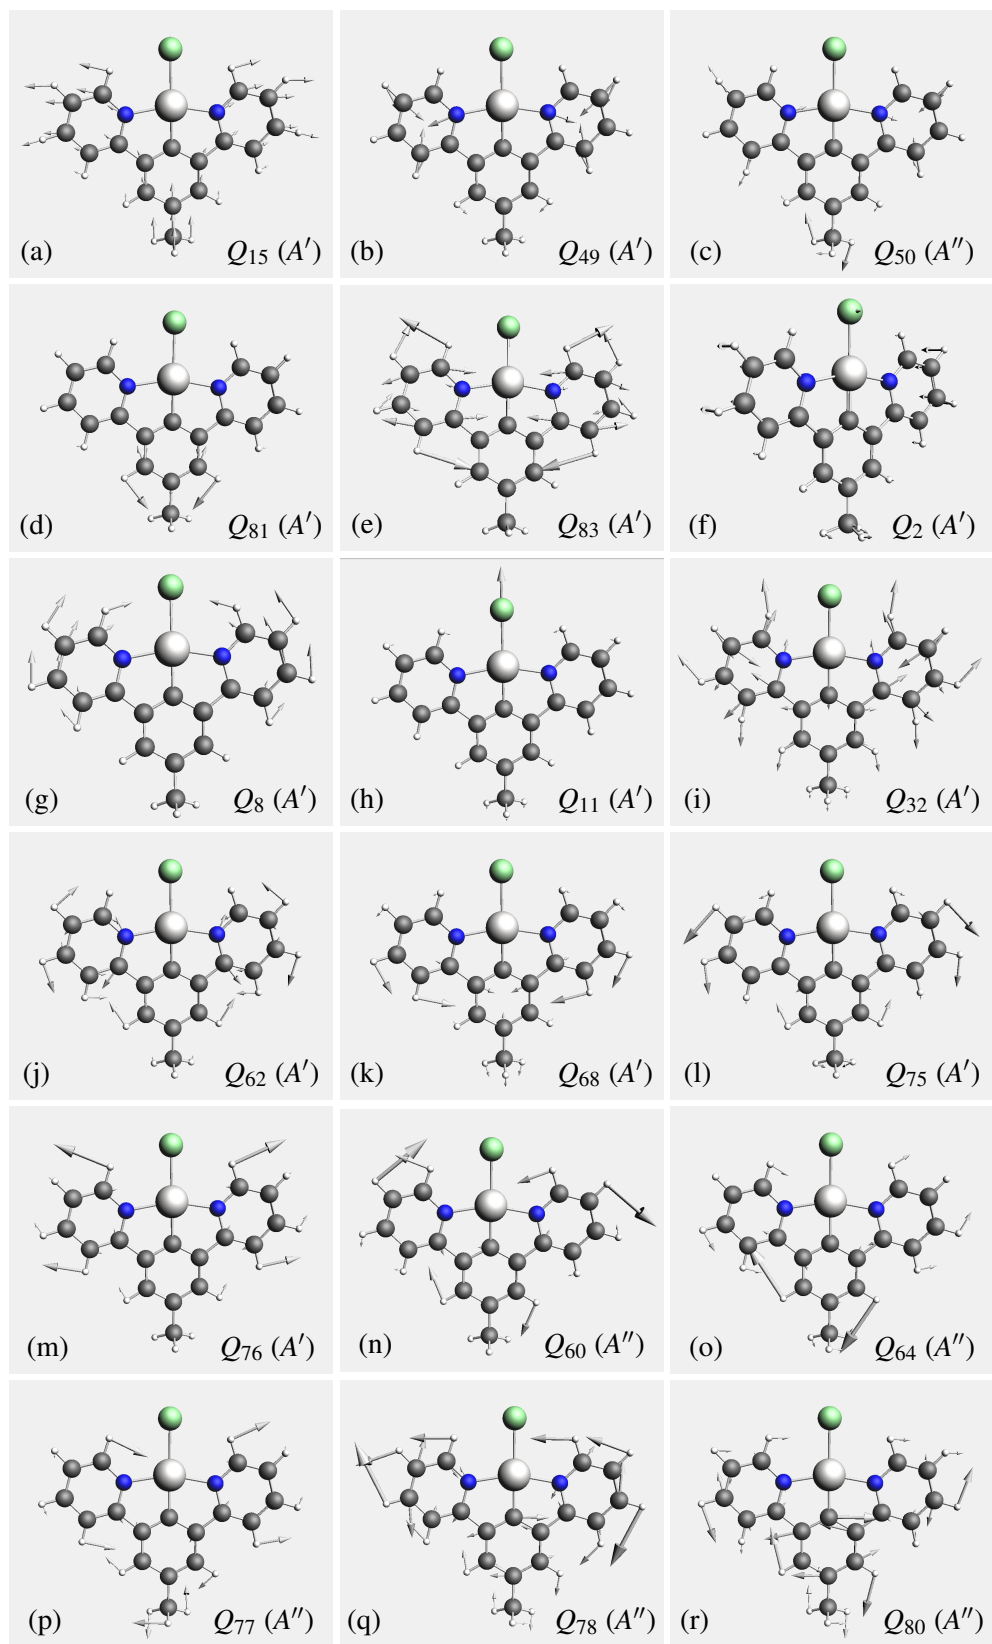

FIG. S2: (a)-(e) depict "metal-carbon and metal- nitrogen bond stretching" modes and (f)-(r) depict "ligand localized in-plane bending" modes.

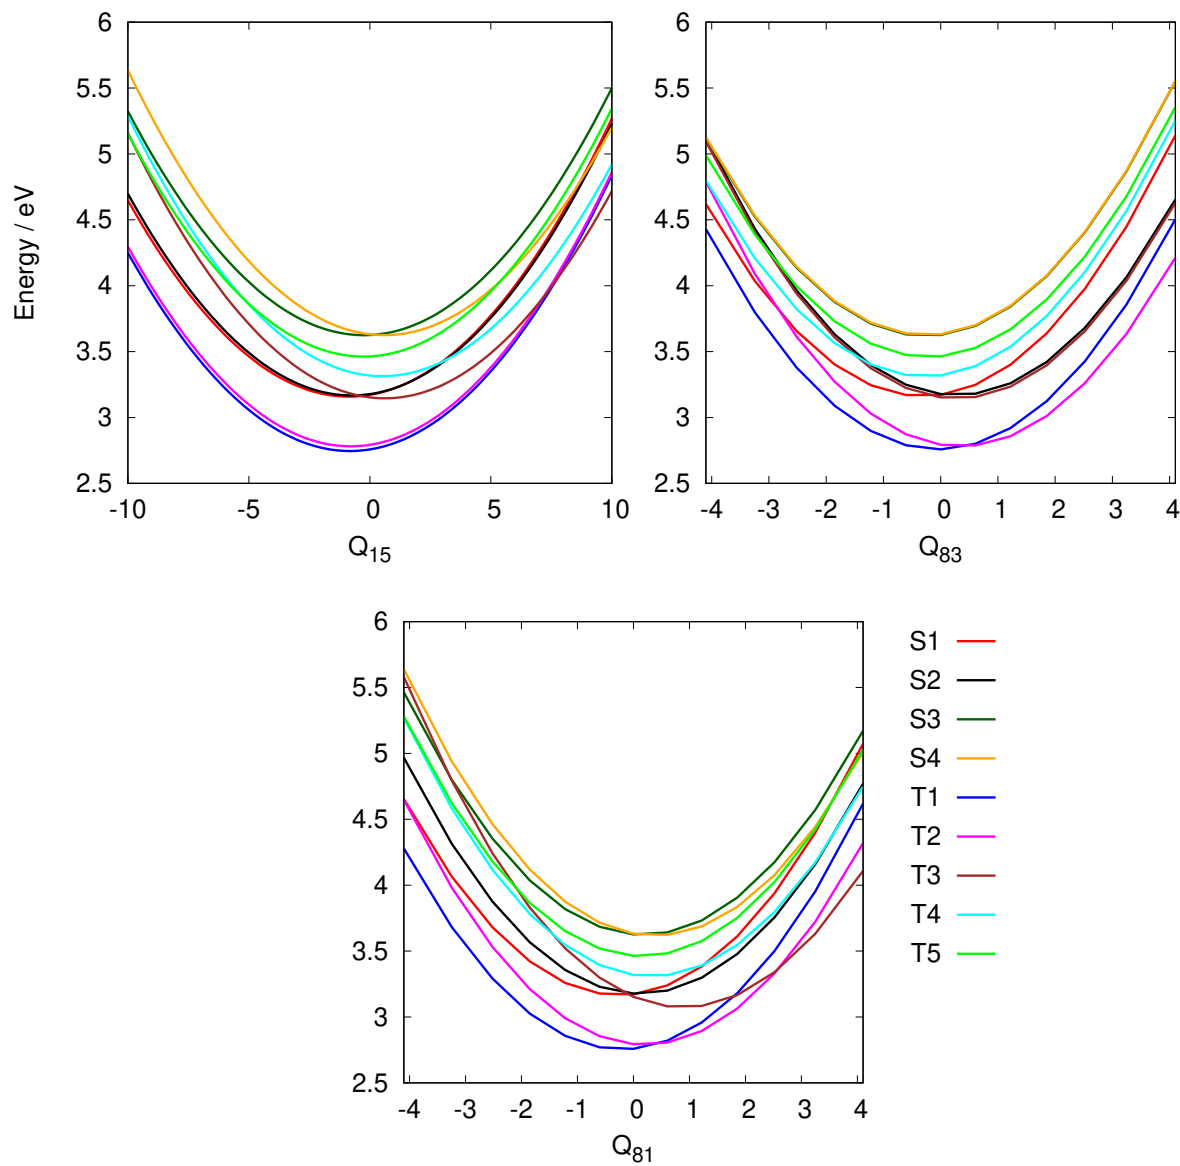

FIG. S3: 1D cut of diabatic potential along  $Q_{15}$ ,  $Q_{83}$  and  $Q_{81}$  modes.

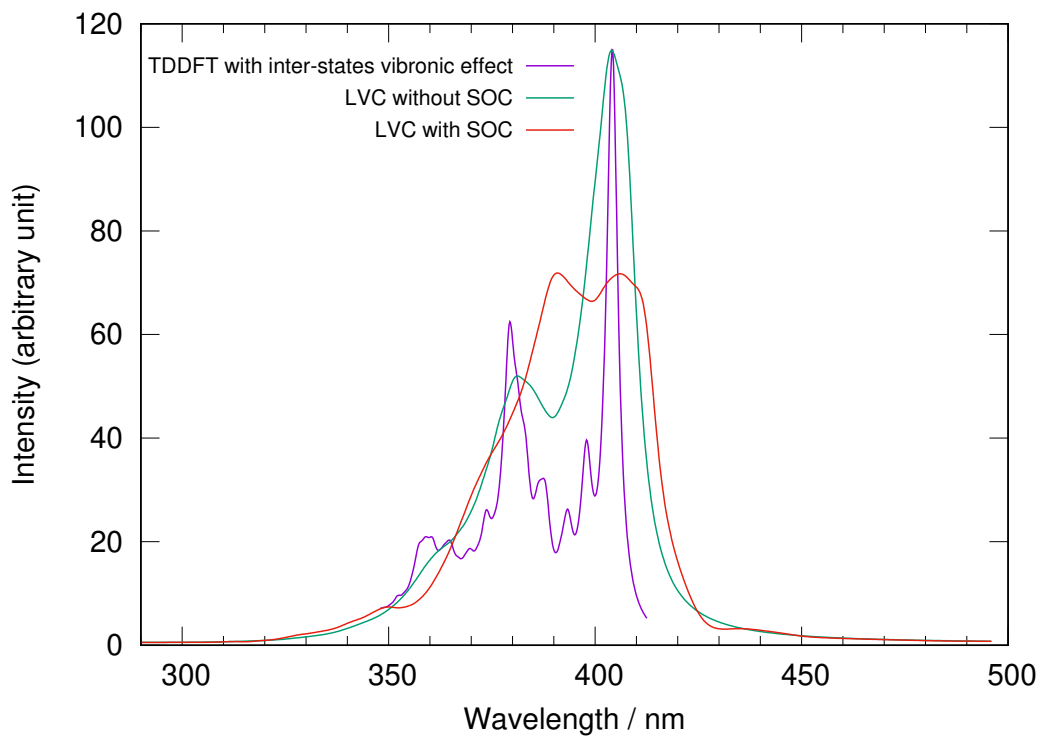

FIG. S4: Comparison of MCTDH calculated spectra with TDDFT vibronic spectra.

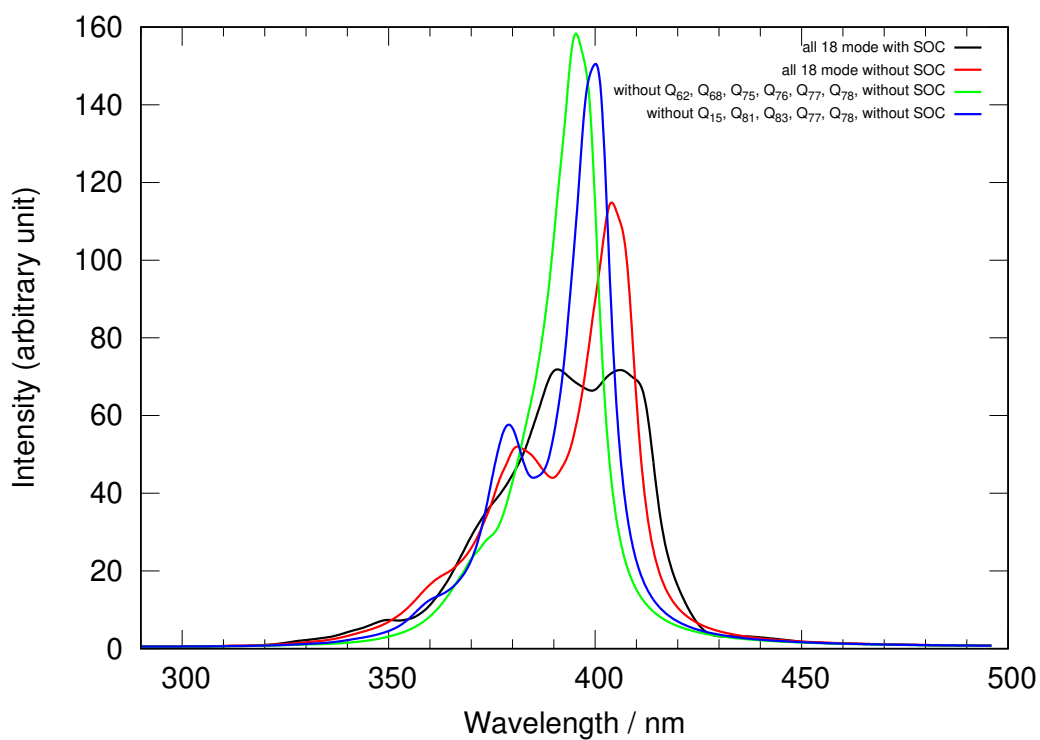

FIG. S5: Effect of different mode and SOC on the calculated spectra from MCTDH.

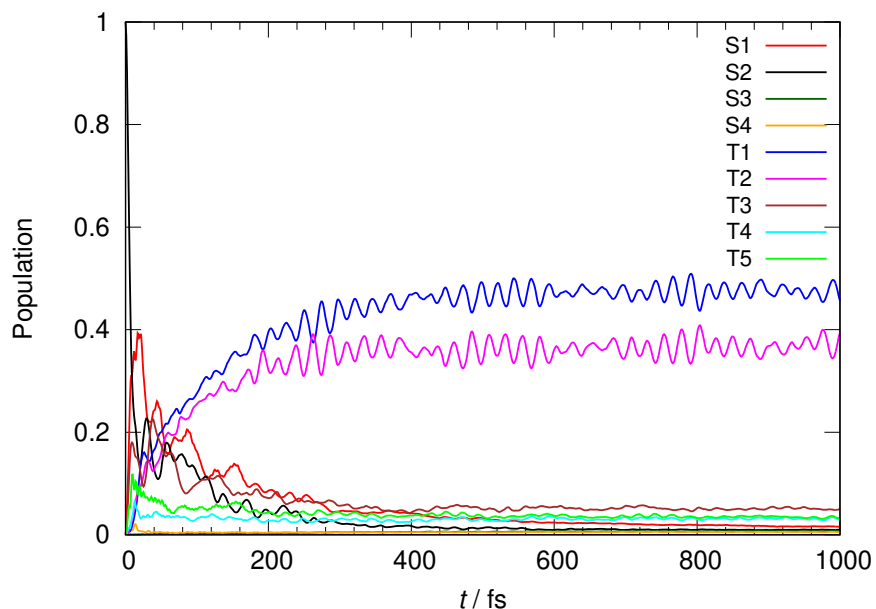

FIG. S6: Time evolution of the diabatic excited state population of [Pt(dpybMe)Cl] after visible light irradiation within 1 ps.

## REFERENCES

- <sup>1</sup>J. Eng, C. Gourlaouen, E. Gindensperger, and C. Daniel, “Spin-vibronic quantum dynamics for ultrafast excited-state processes,” *Account Chem. Res.* **48**, 809–817 (2015).
- <sup>2</sup>T. J. Penfold, E. Gindensperger, C. Daniel, and C. M. Marian, “Spin-vibronic mechanism for intersystem crossing,” *Chem. Rev.* **118**, 6975 (2018).
- <sup>3</sup>H. Koppel, W. Domcke, and L. S. Cederbaum, “Multimode molecular dynamics beyond the born-oppenheimer approximation,” *Adv. Chem. Phys.* **57**, 59–246 (1984).
- <sup>4</sup>M. Fumanal, F. Plasser, S. Mai, C. Daniel, and E. Gindensperger, “Interstate vibronic coupling constants between electronic excited states for complex molecules,” *J. Chem. Phys.* **148**, 124119 (2018).
- <sup>5</sup>P. Löwdin, “On the non-orthogonality problem connected with the use of atomic wave functions in the theory of molecules and crystals,” *J. Chem. Phys.* **18**, 365 (1950).
- <sup>6</sup>G. Granucci, M. Persico, and A. Toniolo, “Direct semiclassical simulation of photochemical processes with semiempirical wave functions,” *J. Chem. Phys.* **114**, 10608 (2001).
- <sup>7</sup>F. Plasser, G. Granucci, J. Pittner, M. Barbatti, M. Persico, and H. Lischka, “Surface hopping dynamics using a locally diabatic formalism: Charge transfer in the ethylene dimer cation and

excited state dynamics in the 2-pyridone dimer,” *J. Chem. Phys.* **137**, 22A514 (2012).

<sup>8</sup>J. A. G. Williams, A. Beeby, E. S. Davies, J. A. Weinstein, and C. Wilson, “An alternative route to highly luminescent platinum(ii) complexes: Cyclometalation with n-c-n-coordinating dipyritylbenzene ligands,” *Inorg. Chem.* **42**, 8609 (2003).
